# Supplementary material for: An analysis of frailty and multimorbidity in 20,566 UK Biobank participants with type 2 diabetes
Source: PubMed Central journal article supplement (PMC9053176; doi:10.1038/s43856-021-00029-9), 2021-08-27
Supplement: 43856_2021_29_MOESM1_ESM.pdf [file 43856_2021_29_MOESM1_ESM.pdf]

## **Description of Additional Supplementary Files**

**File Name:** Supplementary Data 1

**Description:** ICD-10 codes for charlson index conditions

**File Name:** Supplementary Data 2

**Description:** conditions included in count of long-term conditions (self-reported terms and ICD-10 codes)

**File Name:** Supplementary Data 3

**Description:** Frailty index deficits

**File Name:** Supplementary Data 4

**Description:** Relationship between frailty and baseline characteristics

**File Name:** Supplementary Data 5

**Description:** Relationship between multimorbidity and baseline characteristics

**File Name:** Supplementary Data 6

**Description:** Relationship between frailty, multimorbidity, age, sex, and adverse outcomes

**File Name:** Supplementary Data 7

**Description:** Data underlying figures within main manuscript text
